# Supplementary material for: CDH1 Genotype Exploration in Women With Hereditary Lobular Breast Cancer Phenotype
Source: PubMed Central journal article supplement (PMC11040411; doi:10.1001/jamanetworkopen.2024.7862), 2024-04-23

## Supplementary Online Content

Corso G, Marino E, Zanzottera C, et al. *CDH1* genotype exploration in women with hereditary lobular breast cancer phenotype. *JAMA Netw Open*. 2024;7(4):e247862.  
doi:10.1001/jamanetworkopen.2024.7862

**eTable 1.** Clinical Criteria Adopted in the Study for Germline *CDH1* Genetic Testing in LBC Women

**eTable 2.** In Silico Predictions for *CDH1* Missense Variants

**eTable 3.** Germline *BRCA1* Variants Identified in Patients With LBC Enrolled in the Study

**eTable 4.** Germline *BRCA2* Variants Identified in Patients With LBC Enrolled in the Study

**eTable 5.** Median Age at Diagnosis Between Pathogenic vs Other Identified *CDH1* Variants or Wild-Type

**eTable 6.** Comparison of Clinical-Pathological Variables in Relation to the Genetic Profile of Patients With LBC

**eTable 7.** Overall Frequency of *CDH1* Structural and Epigenetic Alterations Described in Literature and in This Study's HLBC Tumors

**eTable 8.** Differences Between the 2 Studies That Explored *CDH1* Gene Testing in HLBC

**eTable 9.** Identified Germline P/LP *BRCA1*, *BRCA2*, and *CDH1* Variants

**eFigure 1.** Flow Diagram of the Study Organization, Germline Genetic Testing Results, and Clinical Features of Families With Germline *CDH1* Variant

**eFigure 2.** Pedigree With Germline Pathogenic *CDH1* Variation Carriers

**eFigure 3.** Loss of E-Cadherin Expression in Invasive Lobular Breast Carcinoma From *CDH1* Germline Variant Carrier

**eFigure 4.** Disease-Free Survival Results Between Different Variant Statuses, Including Wild-Type Population

This supplementary material has been provided by the authors to give readers additional information about their work.

**eTable 1.** Clinical criteria for germline *CDH1* genetic testing in LBC women adopted in the study.

| Criteria | LBC manifestation | Age at onset | BC family history |
|----------|-------------------|--------------|-------------------|
| A        | Bilateral         | Any age      | Positive/Negative |
| B        | Unilateral        | Any age      | Positive          |
| C*       | Unilateral        | ≤45          | Negative          |

\*Sporadic early onset LBC is a novel criterion; LBC, lobular breast cancer

**eTable 2. *In silico* predictions for CDH1 missense variants.** Missense variants identified in this study were evaluated through *in silico* approaches analysing sequence homology, amino acid physical properties, and their impact on protein structure. In detail, the impact of each variant on protein function was estimated through PROVEAN (Protein Variation Effect Analyzer, <http://provean.jcvi.org/index.php>), SIFT (Sorting Intolerant From Tolerant, <http://sift.jcvi.org/>), PolyPhen-2 (<http://genetics.bwh.harvard.edu/pph2/>), and FoldX (<http://foldxsuite.crg.eu/>) algorithms. PROVEAN, SIFT and Polyphen-2 software were run with the Ensembl transcript 261769, using the following substitutions: T115M, P488S, P537L, R545G, and A636T. PROVEAN classifies variants as deleterious with a score equal or below -2.5. Variants generating a score below 0.05 by SIFT are classified as damaging. Structural impact of specified variants was calculated using FoldX (version 5) implemented in Linux environment (Ubuntu 20.04.2 LTS). Native-state stability changes between mutant and wild-type structures ( $\Delta\Delta G = \Delta G_{Mut} - \Delta G_{WT}$ ) were automatically calculated in 5 runs. Mutations with  $\Delta\Delta G > 0.8$  kcal/mol are considered destabilizing. For our missense variants, scores obtained in each algorithm are specified in the table below. Despite rarely observed, the applied algorithms were consistent for c.1610C>T and c.1906G>A variants. Specifically, the c.1610C>T variant is located in a conserved region and is expected to affect E-cadherin function (PROVEAN score -5.80, SIFT score 0.004, and PolyPhen score 0.999). This variant is also predicted to lead to structural destabilization with an energetic difference between mutant and the WT reference of 1.021 kcal/mol, which may indicate its premature degradation by mechanisms of protein quality control. For the c.1906G>A variant, all the *in silico* tools predict an unlikely functional impact. As observed in table below, PROVEAN, SIFT and PolyPhen yield scores compatible with neutral or tolerated variants. Further, no major impact in protein structure is foreseen for this variant according to FoldX. Concerning the remaining missense variants, potential impact was variable across the distinct tools. SIFT did not identify c.344C>T, c.1462C>T and c.1633C>G as potentially damaging, whereas PolyPhen attributed the highest scores compatible with pathogenicity (0.992, 1.000 and 0.996, respectively). On the other hand, PROVEAN considered c.344C>T as neutral, and c.1462C>T and c.1633C>G as deleterious (scores of -6.07 and -3.22, respectively). Of note, no destabilizing effects were predicted for either variant through FoldX.

| Nucleotide change | Protein change | Domain    | PROVEAN             | SIFT              | PolyPhen                  | FoldX (kcal/mol)         |
|-------------------|----------------|-----------|---------------------|-------------------|---------------------------|--------------------------|
| c.344C>T          | p.(Thr115Met)  | Prodomain | Neutral (-1.93)     | Tolerated (0.080) | Probably damaging (0.992) | Not destabilized (0,551) |
| c.1462C>T         | p.(Pro488Ser)  | EC4       | Deleterious (-6.07) | Tolerated (0.173) | Probably damaging (1.000) | Not destabilized (0,656) |
| c.1610C>T         | p.(Pro537Leu)  | EC4       | Deleterious (-5.80) | Damaging (0.004)  | Probably damaging (0.999) | Destabilized (1,021)     |
| c.1633C>G         | p.(Arg545Gly)  | EC4       | Deleterious (-3.22) | Tolerated (0.159) | Probably damaging (0.996) | Not destabilized (0,706) |
| c.1906G>A         | p.(Ala636Thr)  | EC5       | Neutral (-0.45)     | Tolerated (0.571) | Benign (0.173)            | Not destabilized (0,200) |

**eTable 3.** Germline *BRCA1* variants identified in LBC patients enrolled in the study.

| ID      | Sequence variant * | Protein change | Type     | Interpretation |
|---------|--------------------|----------------|----------|----------------|
| 834-034 | c.3835G>A          | p.(Ala1279Thr) | Missense | Likely Benign  |
| 834-047 | c.3116C>T          | p.(Ala1039Val) | Missense | VUS            |
| 834-074 | c.3257T>G          | p.(Leu1086Ter) | Nonsense | Pathogenic     |
| 834-088 | c.3596C>T          | p.(Ala1199Val) | Missense | Likely Benign  |
| 834-162 | c.509G>A           | p.(Arg170Gln)  | Missense | VUS            |
| 834-167 | c.2933A>G          | p.(Tyr978Cys)  | Missense | VUS            |
| 834-178 | c.43A>C            | p.(Ile15Leu)   | Missense | Likely Benign  |
| 834-316 | c.1251T>G          | p.(Asn417Lys)  | Missense | VUS            |
| 834-373 | c.535T>C           | p.(Tyr179His)  | Missense | VUS            |

\* HGVS nomenclature [Reference sequence (Human Feb. 2009 - GRCh37/hg19 Assembly): NM\_007294.4];  
VUS, variant of unknown significance; LBC, lobular breast cancer

**eTable 4.** Germline *BRCA2* variants identified in LBC patients enrolled in the study.

| ID      | Sequence variant * | Protein change       | Type       | Interpretation |
|---------|--------------------|----------------------|------------|----------------|
| 834-018 | c.7507G>A          | p.(Val2503Ile)       | Missense   | VUS            |
| 834-031 | c.1256G>A          | p.(Cys419Tyr)        | Missense   | VUS            |
| 834-031 | c.10154G>A         | p.(Arg3385His)       | Missense   | VUS            |
| 834-045 | c.9271G>A          | p.(Val3091Ile)       | Missense   | VUS            |
| 834-061 | c.5267T>A          | p.(Val1756Glu)       | Missense   | VUS            |
| 834-081 | c.7180A>T          | p.(Arg2394Ter)       | Nonsense   | Pathogenic     |
| 834-083 | c.2808_2811delACAA | p.(Ala938ProfsTer21) | Frameshift | Pathogenic     |
| 834-144 | c.7007+16A>C       | (p.?)                | Intronic   | VUS            |
| 834-150 | c.518G>T           | p.(Gly173Val)        | Missense   | VUS            |
| 834-184 | c.235A>G           | p.(Ile79Val)         | Missense   | VUS            |
| 834-193 | c.3310A>C          | p.(Thr1104Pro)       | Missense   | VUS            |
| 834-193 | c.3503T>A          | p.(Met1168Lys)       | Missense   | VUS            |
| 834-197 | c.5217_5220del     | p.(Tyr1739Ter)       | Nonsense   | Pathogenic     |
| 834-223 | c.4339G>A          | p.(Val1447Ile)       | Missense   | VUS            |
| 834-246 | c.64G>A            | p.(Ala22Thr)         | Missense   | VUS            |
| 834-261 | c.9101A>G          | p.(Gln3034Arg)       | Missense   | VUS            |
| 834-290 | c.6523G>C          | p.(Glu2175Gln)       | Missense   | Likely Benign  |
| 834-336 | c.3413A>T          | p.(Gln1138Leu)       | Missense   | VUS            |
| 834-340 | c.7558C>T          | p.(Arg2520Ter)       | Nonsense   | Pathogenic     |
| 834-343 | c.2905C>T          | p.(Gln969Ter)        | Nonsense   | Pathogenic     |
| 834-348 | c.6405_6409del     | p.(Asn2135LysfsTer3) | Frameshift | Pathogenic     |
| 834-361 | c.6461A>C          | p.(Tyr2154Ser)       | Missense   | VUS            |
| 834-392 | c.4301A>T          | p.(Lys1434Ile)       | Missense   | VUS            |
| 834-399 | c.6037A>G          | p.(Lys2013Glu)       | Missense   | VUS            |

\* HGVS nomenclature [Reference sequence (Human Feb. 2009 - GRCh37/hg19 Assembly): NM\_000059.4]  
VUS, variant of unknown significance; LBC, lobular breast cancer

**eTable 5.** Median age at diagnosis between pathogenic vs other identified *CDH1* variants/wild-type.

| <b>a</b>                 | <b>P</b>         | <b>VUS+LB</b>  | <b>P-value for difference</b> |
|--------------------------|------------------|----------------|-------------------------------|
|                          |                  |                | <b>.03</b>                    |
| <b>Age, median (IQR)</b> | 42.5 (38.3-43.0) | 51 (45.0-53.0) |                               |

-----

| <b>b</b>                 | <b>P</b>         | <b>VUS+LB+WT</b> | <b>P-value for difference</b> |
|--------------------------|------------------|------------------|-------------------------------|
|                          |                  |                  | <b>.009</b>                   |
| <b>Age, median (IQR)</b> | 42.5 (38.3-43.0) | 47 (43.0-53.0)   |                               |

**eTable 6.** Comparison of clinical-pathological variables in relation to the genetic profile of patients with LBC.

| Variable                                   | Overall (394) | Wild-type (350) | <i>CDH1</i> (15) | <i>BRCA1</i> (9) | <i>BRCA2</i> (22) | P-value |
|--------------------------------------------|---------------|-----------------|------------------|------------------|-------------------|---------|
| <u>Age, median (IQR)</u>                   | 46 (43-53)    | 47 (43-53)      | 44 (42.5-51)     | 48 (44.5-54.5)   | 46.5 (41-55.8)    | 0.61    |
| <u>Menopausal status</u>                   |               |                 |                  |                  |                   |         |
| Pre-                                       | 239 (60.7)    | 214 (61.1)      | 8 (53.3)         | 6 (66.7)         | 12 (54.5)         | .36     |
| Post-                                      | 117 (29.7)    | 100 (28.6)      | 6 (40.0)         | 3 (33.3)         | 9 (40.9)          |         |
| Peri-                                      | 34 (8.6)      | 34 (9.7)        | 0 (0)            | 0 (0)            | 0 (0)             |         |
| Missing                                    | 4 (1.0)       | 2 (0.6)         | 1 (6.7)          | 0 (0)            | 1 (4.6)           |         |
| <u>BC family history</u>                   |               |                 |                  |                  |                   |         |
| No                                         | 124 (31.5)    | 108 (30.9)      | 5 (33.3)         | 2 (22.2)         | 9 (40.9)          | .83     |
| 1 <sup>st</sup> degree                     | 138 (35.0)    | 127 (36.3)      | 3 (13.3)         | 5 (55.6)         | 5 (22.7)          |         |
| 2 <sup>nd</sup> degree                     | 126 (32.0)    | 110 (31.4)      | 6 (40.0)         | 2 (22.2)         | 8 (36.4)          |         |
| 3 <sup>rd</sup> degree                     | 1 (0.2)       | 1 (0.3)         | 0 (0)            | 0 (0)            | 0 (0)             |         |
| 1 <sup>st</sup> and 2 <sup>nd</sup> degree | 1 (0.2)       | 1 (0.3)         | 0 (0)            | 0 (0)            | 0 (0)             |         |
| Missing                                    | 4 (1.1)       | 3 (0.8)         | 1 (6.7)          | 0 (0)            | 0 (0)             |         |
| <u>Grade</u>                               |               |                 |                  |                  |                   |         |
| 1                                          | 45 (11.4)     | 39 (11.1)       | 1 (6.7)          | 1 (11.1)         | 4 (18.2)          | .46     |
| 2                                          | 266 (67.5)    | 234 (66.9)      | 12 (80.0)        | 6 (66.7)         | 14 (63.6)         |         |
| 3                                          | 57 (14.5)     | 54 (15.4)       | 0 (0)            | 2 (22.2)         | 3 (13.6)          |         |
| Missing                                    | 26 (6.6)      | 23 (6.6)        | 2 (13.3)         | 0 (0)            | 1 (4.6)           |         |
| <u>pT</u>                                  |               |                 |                  |                  |                   |         |
| pT1                                        | 191 (48.5)    | 168 (48.0)      | 8 (53.5)         | 5 (55.6)         | 11 (50)           | .91     |
| pT2-pT4                                    | 178 (45.2)    | 157 (44.9)      | 7 (46.5)         | 4 (44.4)         | 11 (50)           |         |
| pTis                                       | 16 (4.1)      | 16 (4.6)        | 0 (0)            | 0 (0)            | 0 (0)             |         |
| Missing                                    | 9 (2.2)       | 9 (2.5)         | 0 (0)            | 0 (0)            | 0 (0)             |         |
| <u>pN</u>                                  |               |                 |                  |                  |                   |         |
| pN0                                        | 97 (24.6)     | 87 (24.9)       | 3 (20)           | 3 (33.3)         | 5 (22.7)          | .99     |
| pN+                                        | 292 (74.1)    | 259 (74.0)      | 11 (73.3)        | 6 (66.7)         | 17 (77.3)         |         |
| Missing                                    | 5 (1.3)       | 4 (1.1)         | 1 (6.7)          | 0 (0)            | 0 (0)             |         |
| <u>HER2</u>                                |               |                 |                  |                  |                   |         |
| Negative                                   | 338 (85.8)    | 302 (86.3)      | 12 (80)          | 8 (88.9)         | 18 (81.8)         | .99     |
| Positive*                                  | 16 (4.1)      | 14 (4.0)        | 1 (6.7)          | 0 (0)            | 1 (4.5)           |         |
| Unknown/doubt                              | 40 (10.1)     | 34 (9.7)        | 2 (13.3)         | 1 (11.1)         | 3 (13.7)          |         |
| <u>Ki67, median (IQR)</u>                  | 15 (10-20)    | 15 (10-20)      | 16 (13.5-21.5)   | 10 (10-10.5)     | 17.5 (10.22-8)    | .13     |
| <u>ER, median (IQR)</u>                    | 95 (90-95)    | 95 (90-95)      | 95 (90-95)       | 92.5 (90-95)     | 95 (90-95)        | .90     |
| <u>PgR, median (IQR)</u>                   | 90 (60-95)    | 90 (60-95)      | 80 (72.5-95)     | 90 (27.5-92.5)   | 90 (62.5-95)      | .97     |

\*HER2 3+, or HER2 2+ with amplified FISH

LBC, lobular breast cancer; IQR, interquartile range; HER2, human epidermal growth factor receptor-2, ER, estrogen receptor, PgR, progesterone receptor.

**eTable 7.** Overall frequency of *CDH1* structural and epigenetic alterations described in literature and in our HLBC tumors.

|                     | Structural |      | Epigenetic  |
|---------------------|------------|------|-------------|
|                     | Mutation   | LOH  | Methylation |
| <i>Sporadic DGC</i> | 4.5%       | 4.5% | 25%         |
| <i>Sporadic LBC</i> | 15-56%     | 50%  | 41-53%      |
| <i>HDGC</i>         | 3%         | 14%  | 47%         |
| <i>HLBC</i>         | 0          | 60%  | 20%         |

LOH, loss of heterozygosity; DGC, diffuse gastric cancer; LBC, lobular breast cancer; HLBC, hereditary lobular breast cancer, HDGC, hereditary diffuse gastric cancer.



**eTable 8.** Differences between the two studies that explored *CDH1* gene testing in HLBC.

|                | HLBC families | Positive <i>CDH1</i> variants | Negative <i>CDH1</i> variants | PTG | GC after PTG | LBC clinic-pathological, survival data | Second-hit characterization | Method                             |
|----------------|---------------|-------------------------------|-------------------------------|-----|--------------|----------------------------------------|-----------------------------|------------------------------------|
| American study | 31            | 19 (61.3%)                    | Unknown                       | 16  | 15           | No                                     | No                          | Prospective cross sectional cohort |
| European Study | 394           | 15 (3.8%)                     | 379                           | 1   | 1            | Yes                                    | Yes                         | Prospective longitudinal cohort    |

**eTable 9.** Identified germline P/LP *BRCA1/2* and *CDH1* variants.

| Gene         | Sporadic Lobular BC* | Sporadic Ductal BC* | Sporadic LBC (our series)** | HLBC (our series)*** | HBOC****     |
|--------------|----------------------|---------------------|-----------------------------|----------------------|--------------|
| <i>BRCA1</i> | 0.3%                 | 2,3%                | 0.9%                        | 0.2%                 | 10-20%       |
| <i>BRCA2</i> | 2,2%                 | 2,4%                | 2.2%                        | 1.2%                 | 5-10%        |
| <i>CDH1</i>  | 0.5%                 | 0.04%               | 0%                          | <b>1.5%</b>          | Not reported |

\*Yadav et al. JCO 2021

\*\*Unpublished data extracted from an independent study still running in our cancer institute (LobularCard Breast trial)

\*\*\*Current study

\*\*\*\*Other data extracted from literature

**eFigure 1. CONSORT flow-diagram of the study organization, germline genetic testing results, and clinical features of families with germline *CDH1* variant.** After initial selection of 5429 primary LBC women, we selected 1867 patients with “expanded” HLBC clinical criteria. A total of 421 LBC women were enrolled, of which 394 were actually tested. A total of 48 germline *CDH1*, *BRCA1*, or *BRCA2* variants were detected. Pedigrees of *CDH1* variant-carriers were explored, with 437 relatives and 116 cancer phenotypes, and BC was the most frequently identified tumor.

\* Proband or relatives can contribute more than one phenotype.

& Mean age at diagnosis.

FH: family history; LBC: lobular breast cancer; HLBC: hereditary lobular breast cancer; P/LP: pathogenic/likely pathogenic; VUS: variant of unknown significance; LB: likely benign; BC: breast cancer.

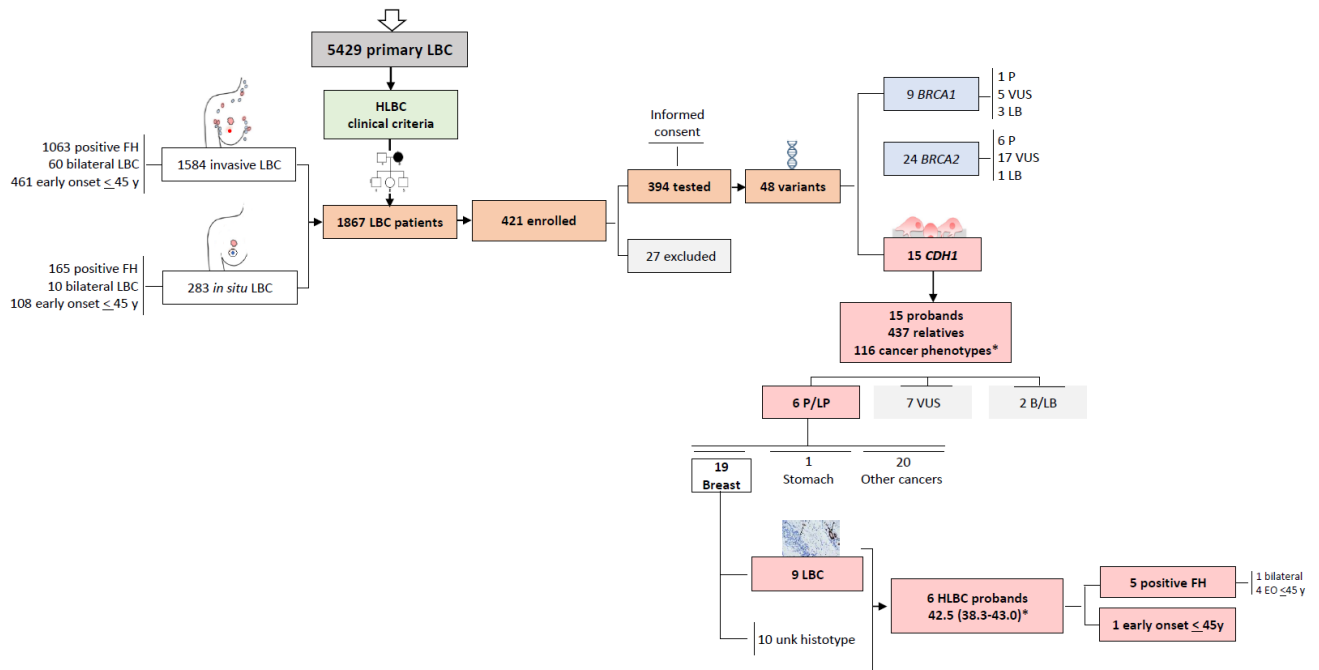

**eFigure 2.** Pedigree with germline *CDH1* mutations (pathogenic) carriers. Arrow indicate the probands, blue symbols (up-right) breast cancer.

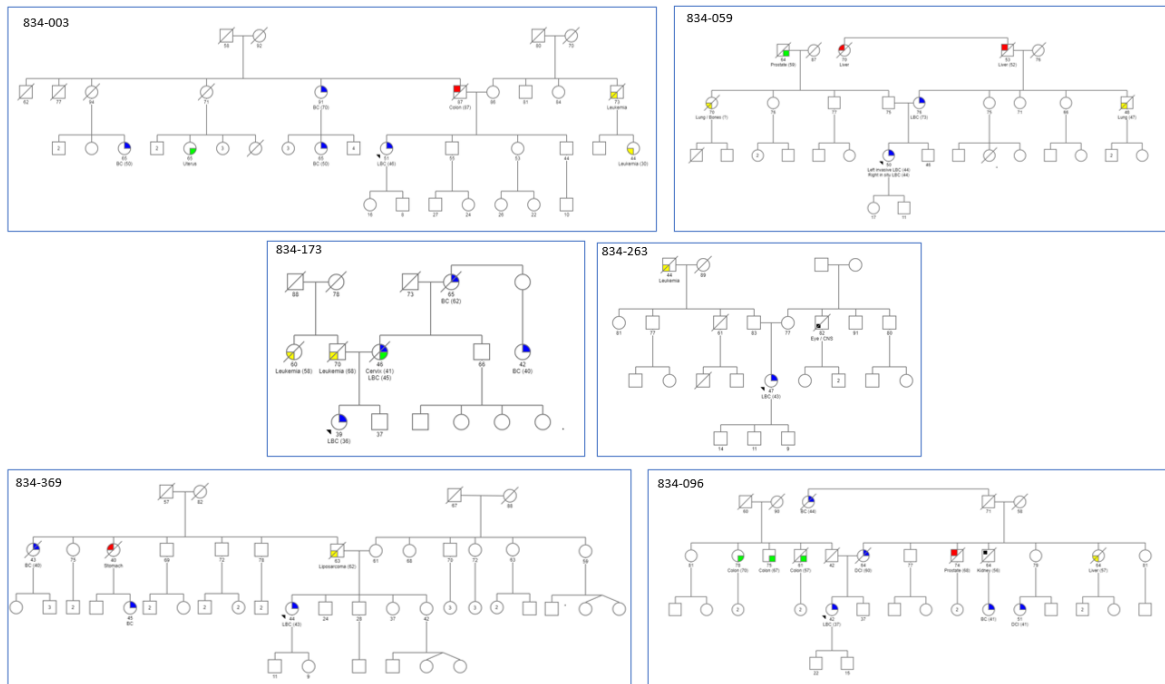

**eFigure 3. Loss of E-cadherin expression in invasive lobular breast carcinoma from *CDH1* germline variant carrier.** Non-to-poorly cohesive neoplastic elements of classic invasive LBC (A, Hematoxylin and eosin, original magnification 100x) showing no immunoreactivity for E-cadherin (B); breast duct (B, arrow) colonized by pagetoid spreading E-cadherin-negative neoplastic cells with a residual inner layer of E-cadherin-positive normal luminal epithelial cells (E-cadherin immunohistochemistry, original magnification 200x).

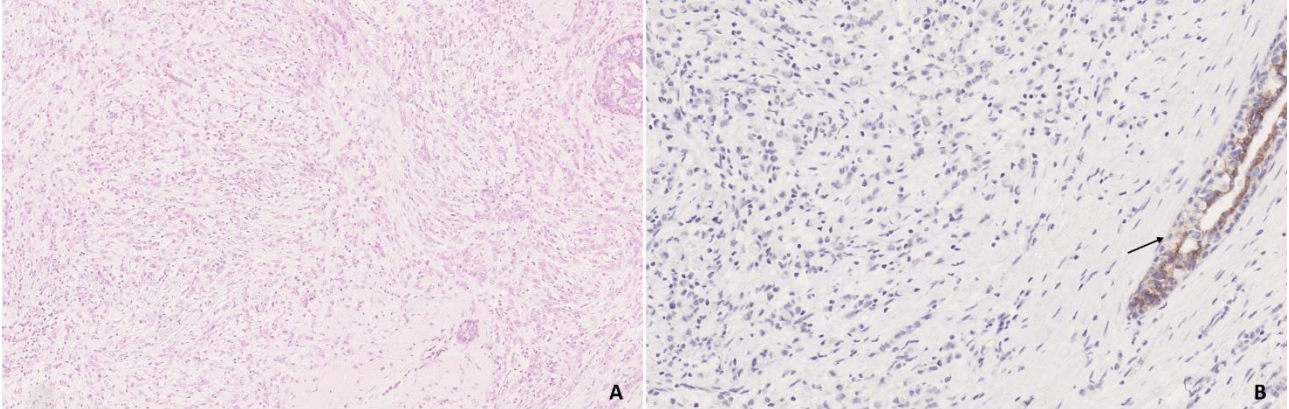

**eFigure 4.** Disease-free survival results between the different variant status, including wild-type population.

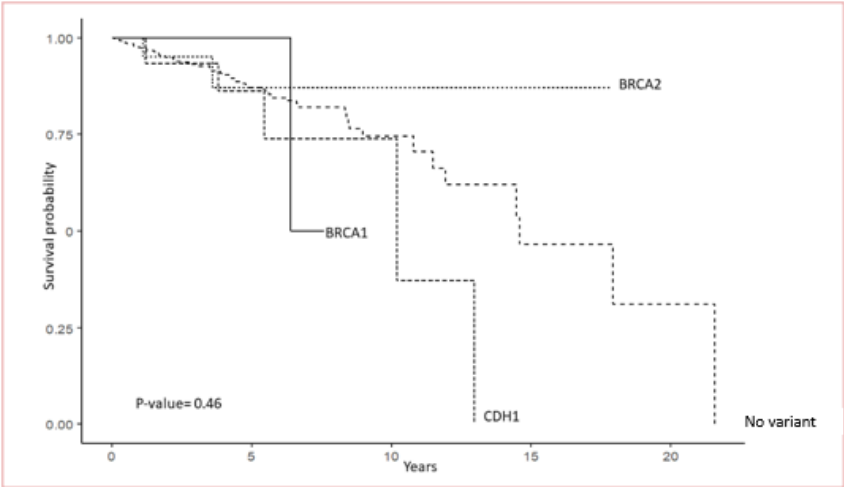

Supplement: jamanetwopen-e247862-s001.pdf [file jamanetwopen-e247862-s001.pdf]
