# Supplementary material for: CDH1 Genotype Exploration in Women With Hereditary Lobular Breast Cancer Phenotype
Source: PubMed Central journal article supplement (PMC11040411; doi:10.1001/jamanetworkopen.2024.7862), 2024-04-23
Supplement: jamanetwopen-e247862-s002.pdf [file jamanetwopen-e247862-s002.pdf]

## Data Sharing Statement

Corso. CDH1 Genotype Exploration in Women With Hereditary Lobular Breast Cancer Phenotype. *JAMA Netw Open*. Published April 23, 2024.  
doi:10.1001/jamanetworkopen.2024.7862

### Data

**Data available:** No

### Additional Information

**Explanation for why data not available:** Data contains sensitive information
